# Supplementary material
Source: PubMed Central journal article supplement (PMC6007114)
Supplement: AEM.00333-18_zam012188571s1.pdf [file AEM.00333-18_zam012188571s1.pdf]

**A** 16S rRNA alpha diversity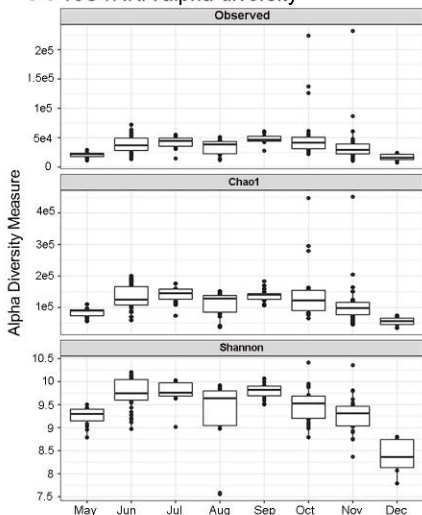**B** 16S rRNA *Vibrio* alpha diversity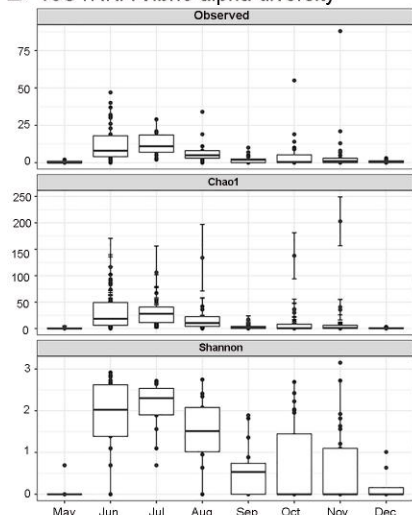**C** hsp60 alpha diversity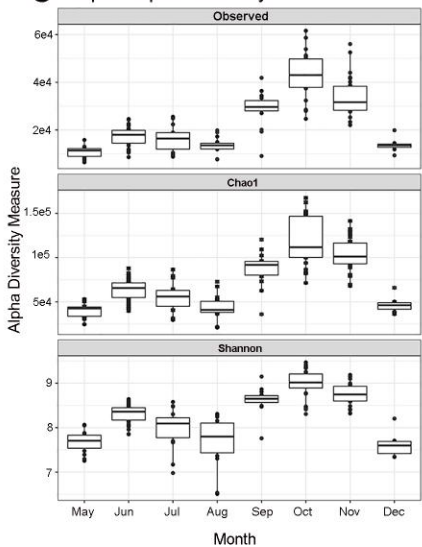**D** hsp60 *Vibrio* alpha diversity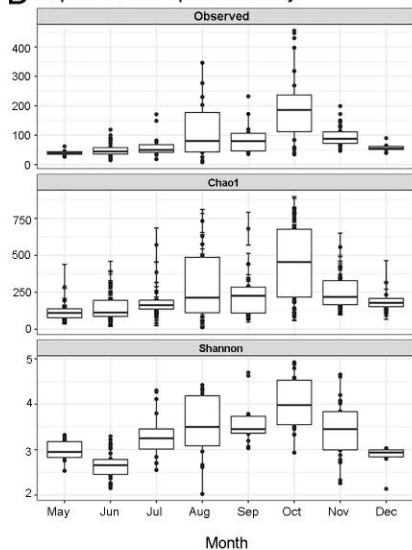

**Figure S1.** Observed, Chao1, and Shannon alpha diversity metrics by month for all 16S sequences (A), 16S *Vibrio* sequences (B), all *hsp60* sequences (C), and *hsp60* *Vibrio* sequences (D).

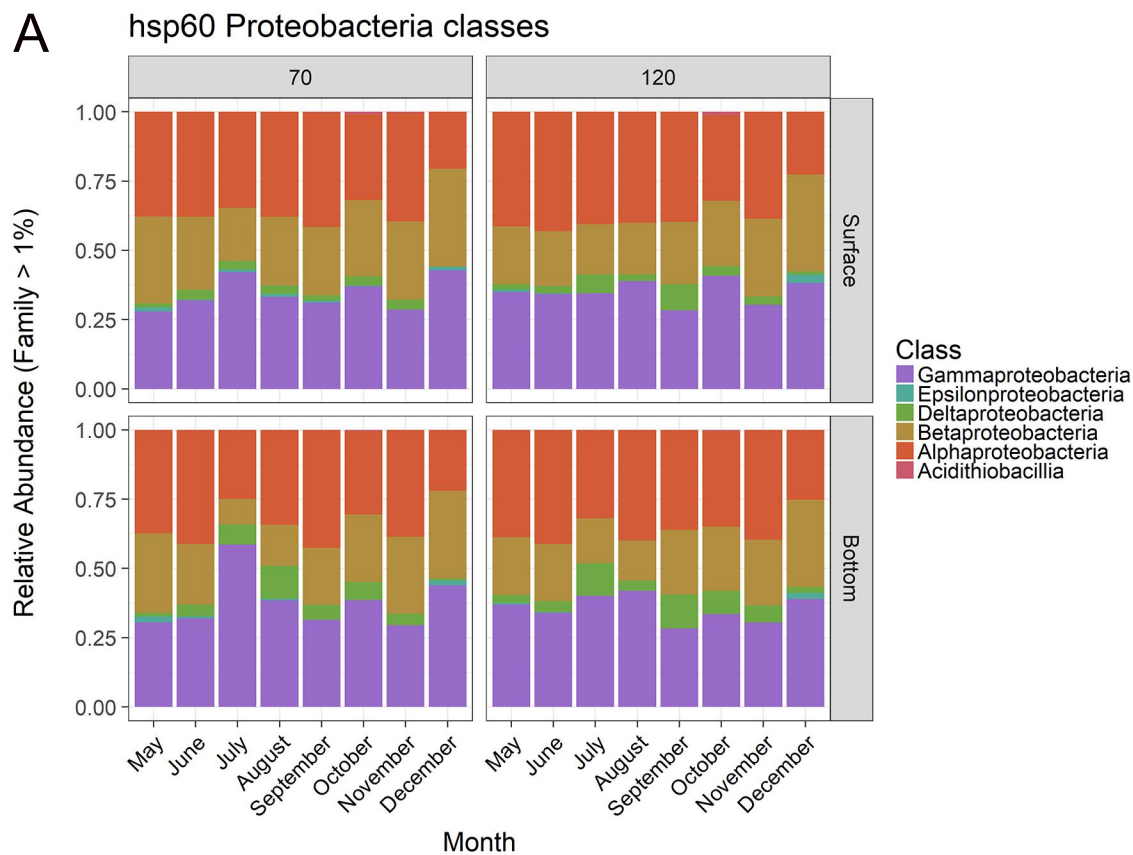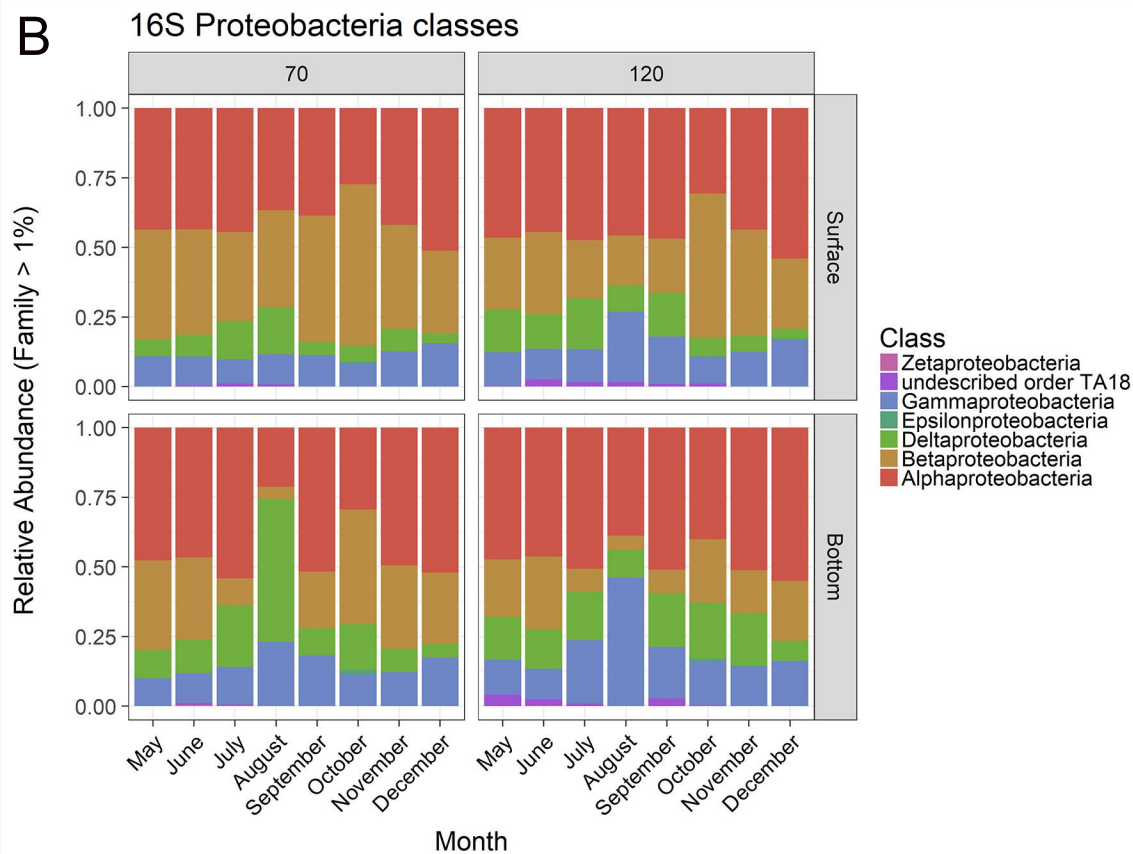

**Figure S2.** Relative abundances of *Proteobacteria* in the NRE by class from May through December 2016 using the *hsp60* gene (A) and 16S rRNA gene (B).

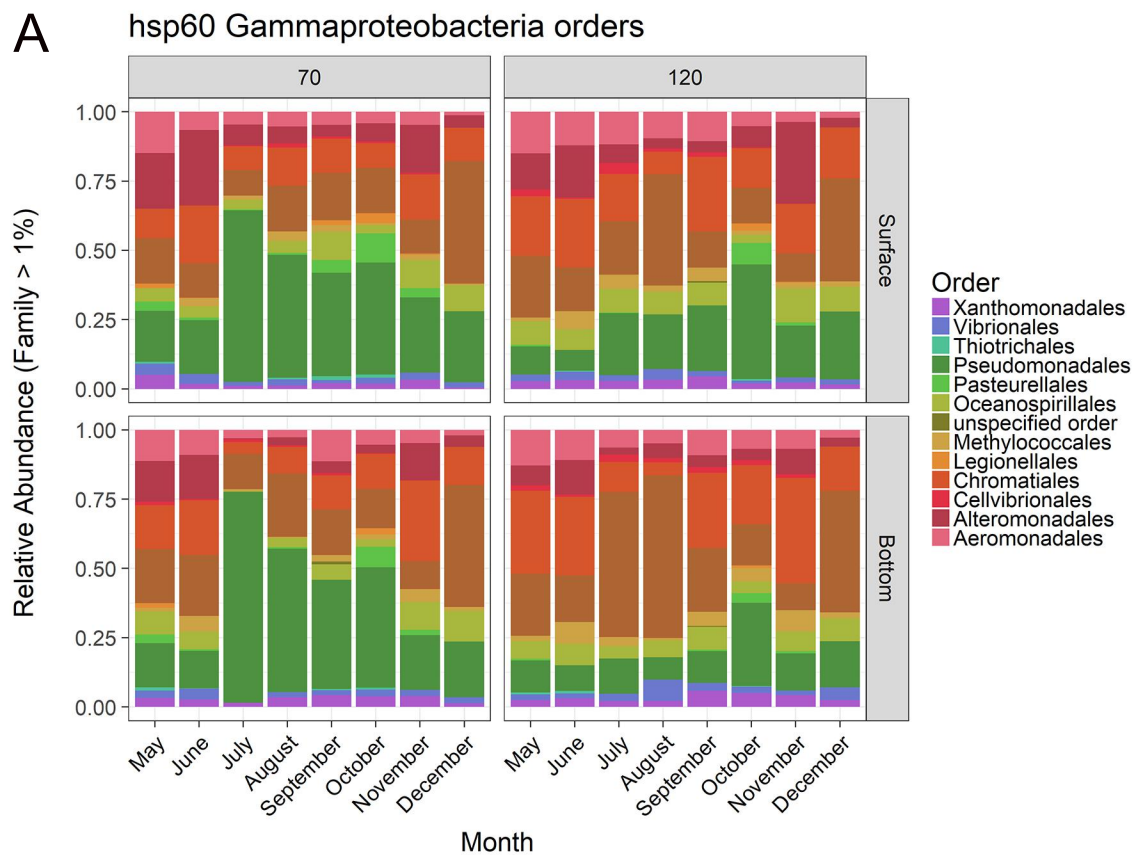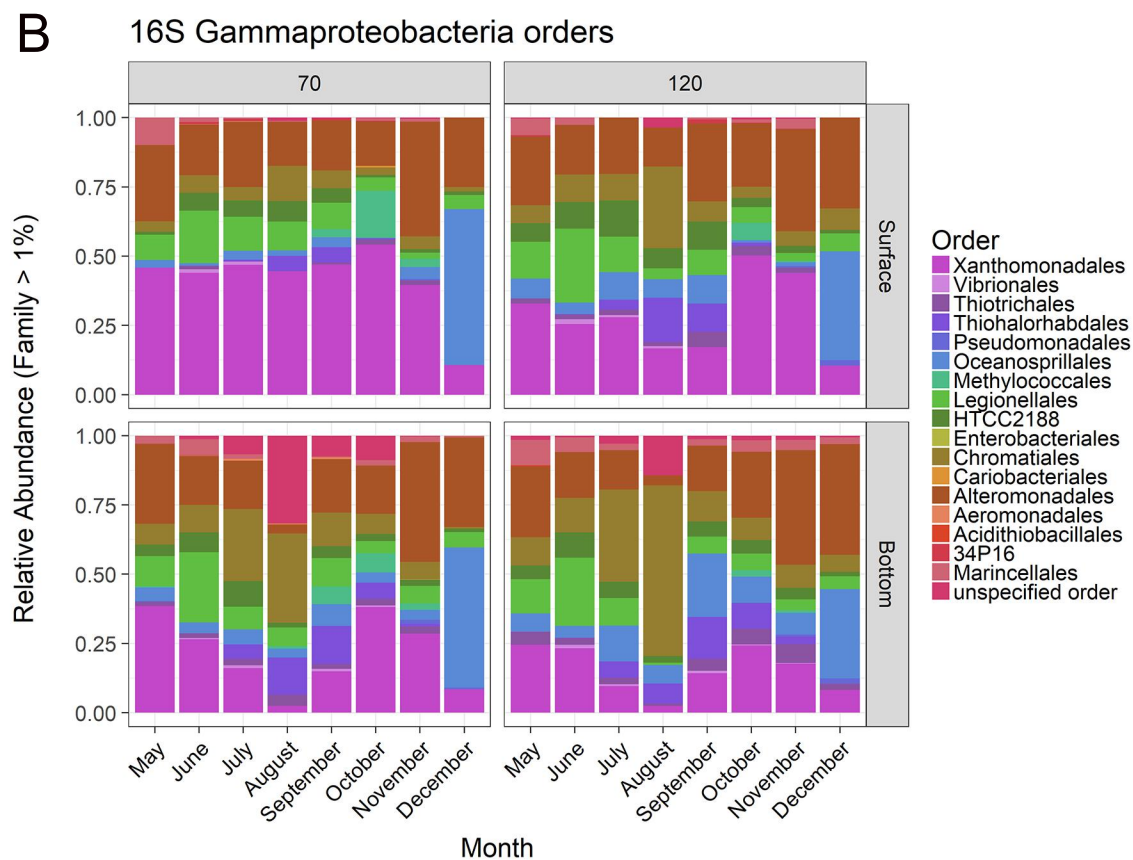

**Figure S3.** Relative abundances of *Gammaproteobacteria* in the NRE by order from May through December 2016 using the *hsp60* gene (A) and 16S rRNA gene (B).

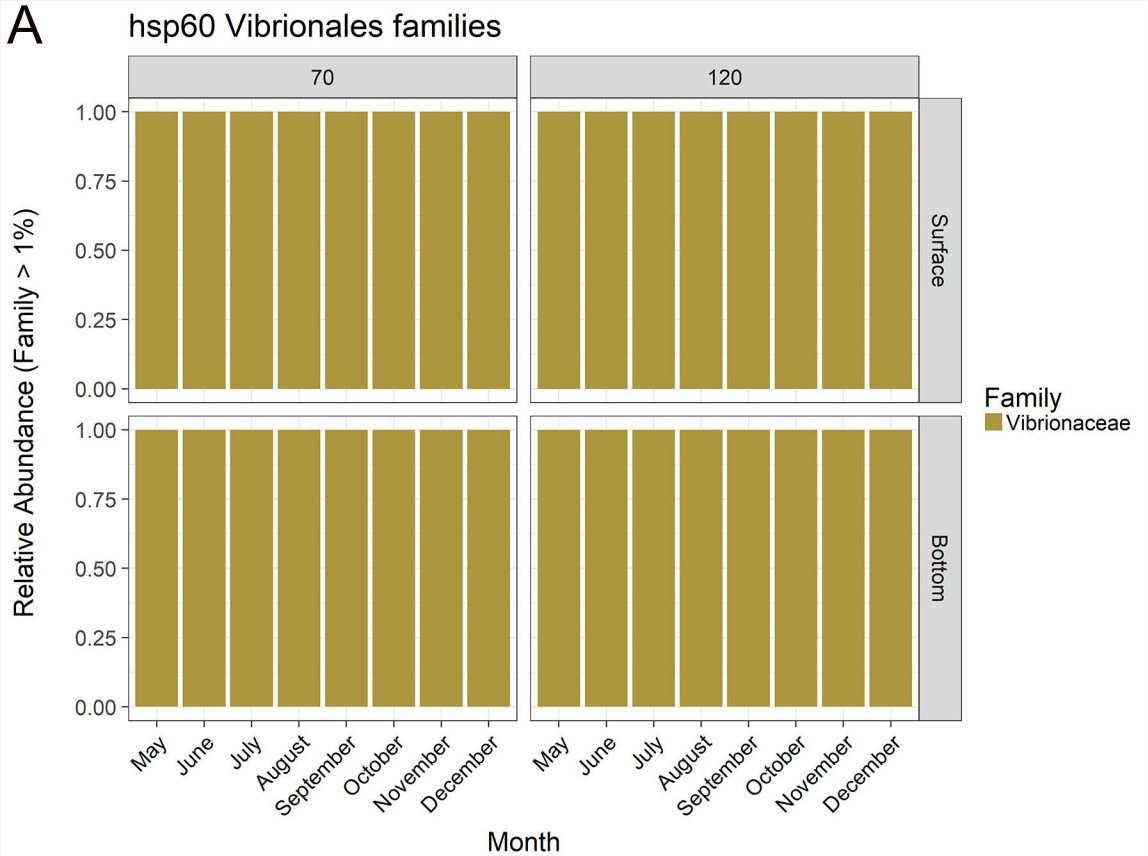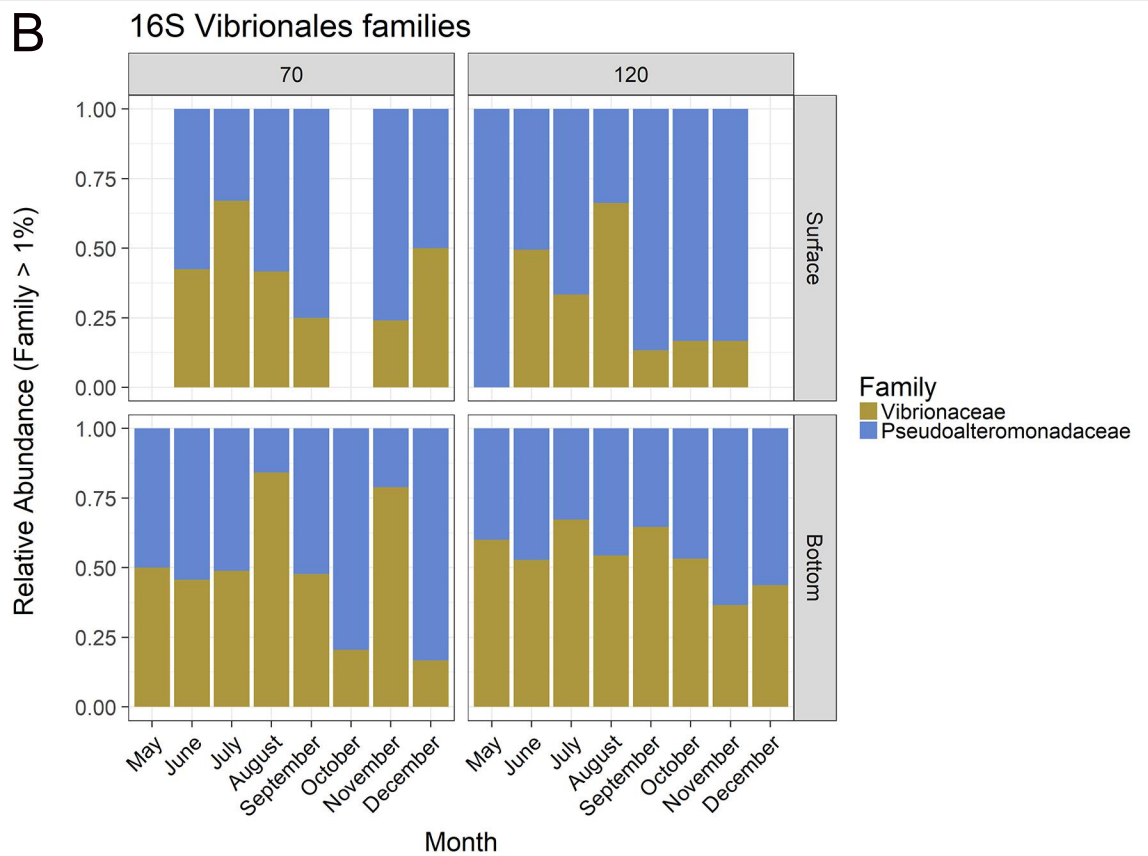

**Figure S4.** Relative abundances of *Vibrionales* in the NRE by family from May through December 2016 using the *hsp60* gene (A) and 16S rRNA gene (B).

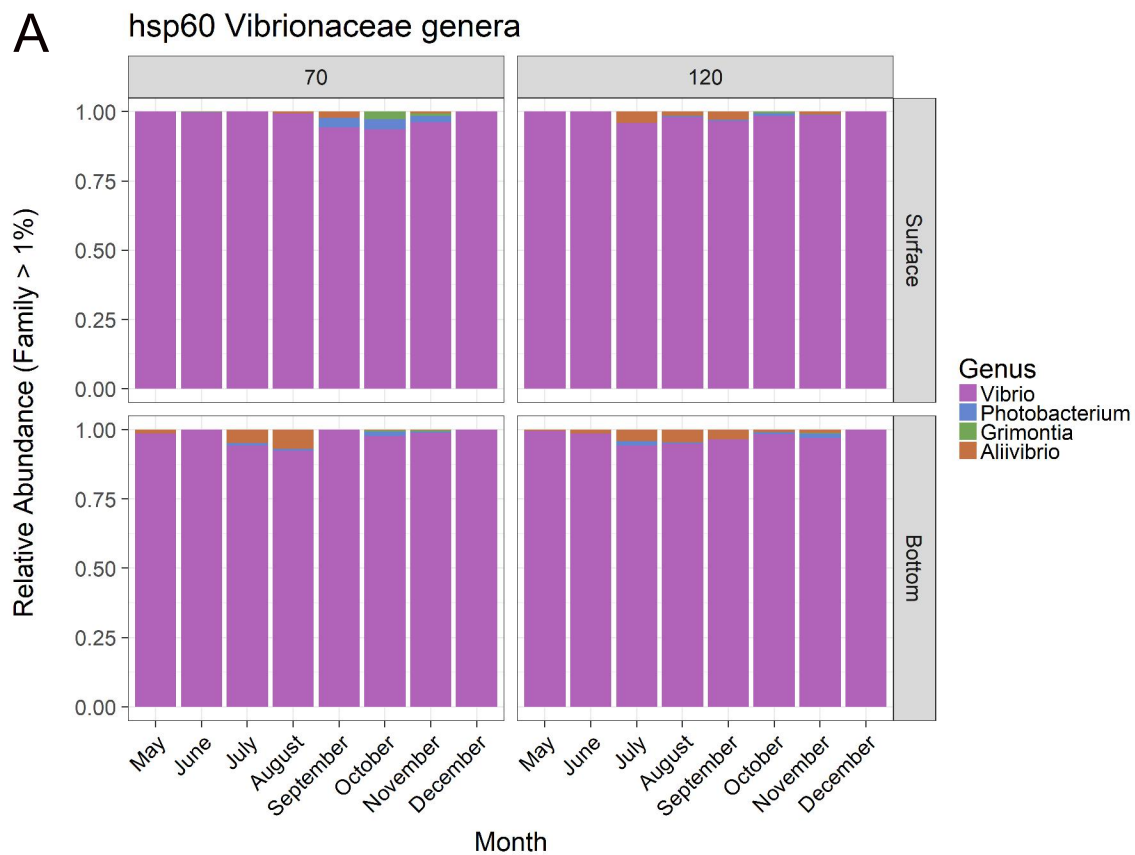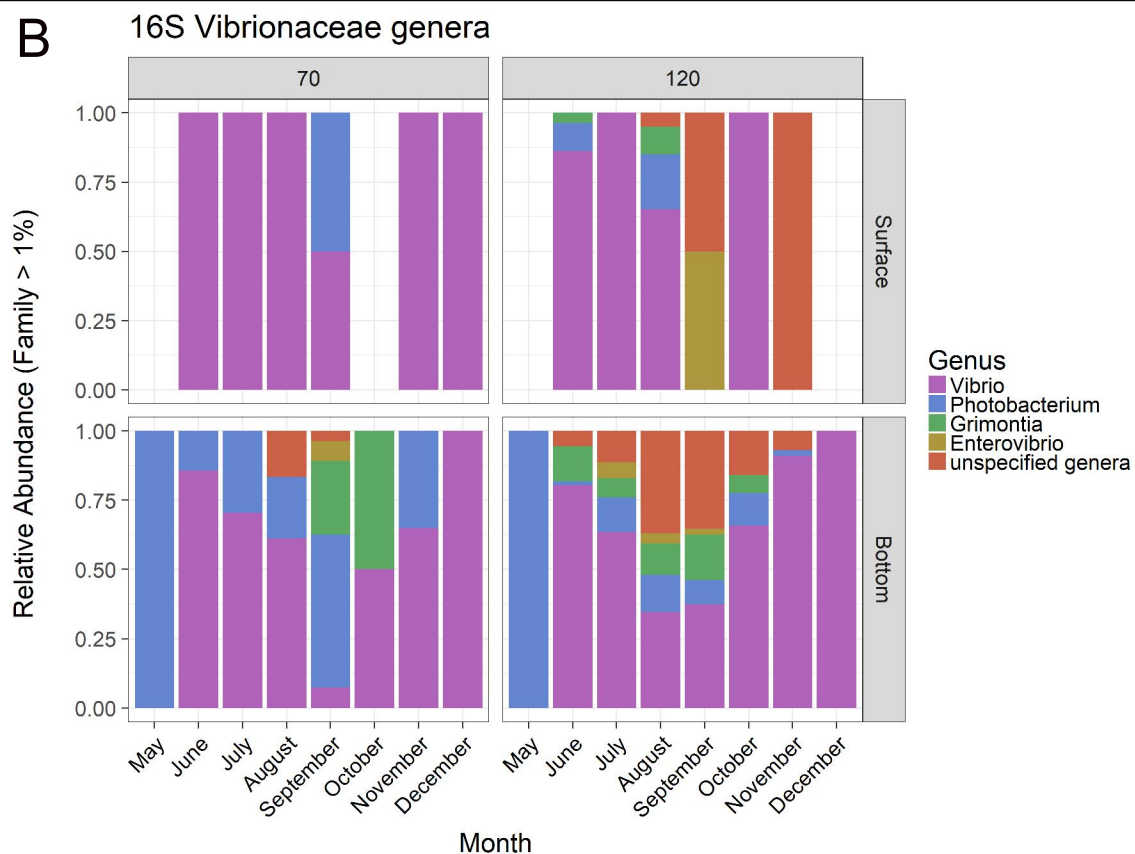

**Figure S5.** Relative abundances of *Vibrionaceae* in the NRE by genus from May through December 2016 using the *hsp60* gene (A) and 16S rRNA gene (B).

## PCO

## Unconstrained ordination

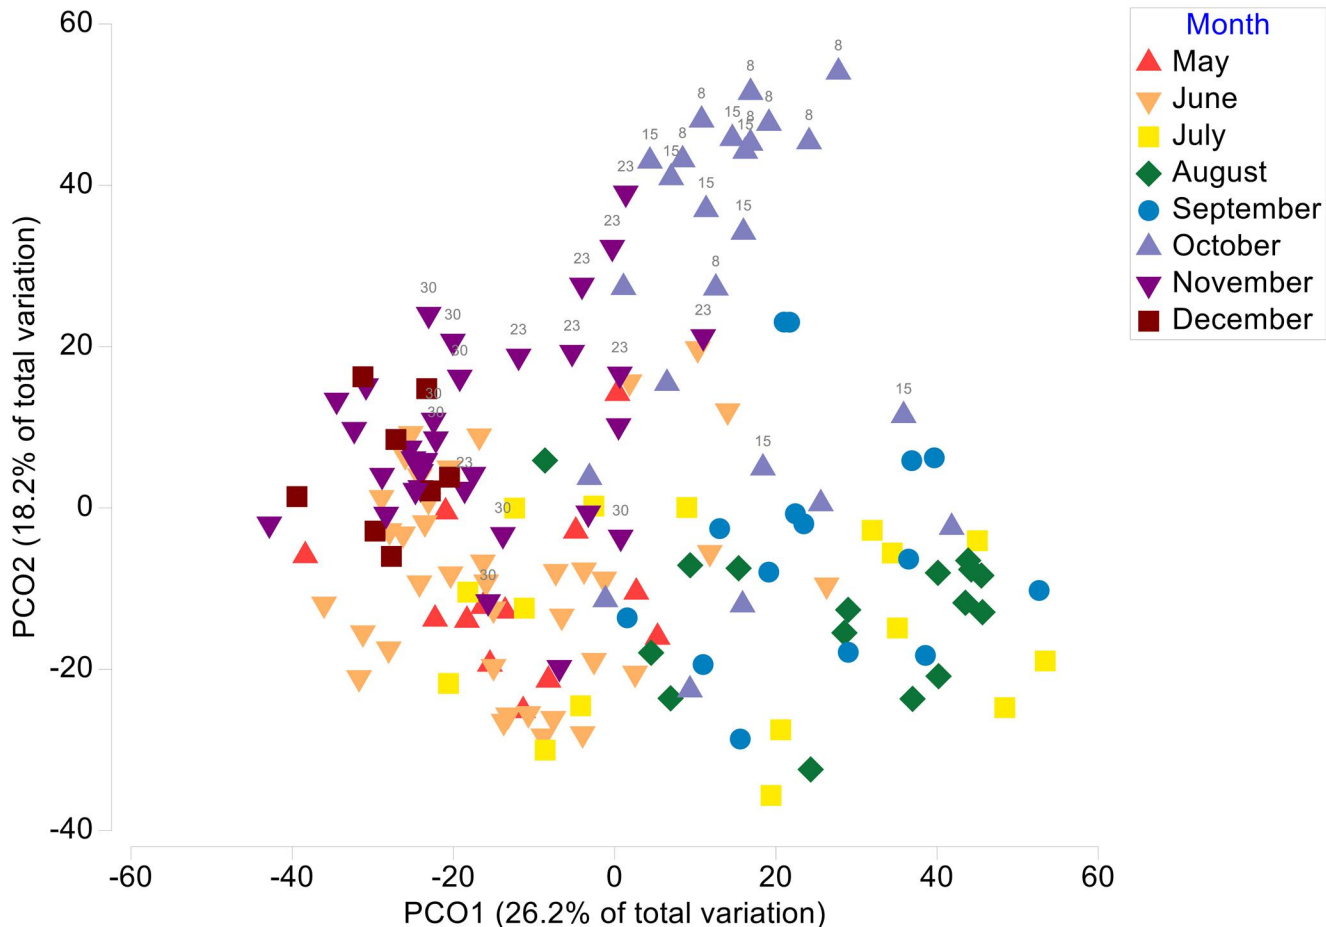

**Figure S6.** Unconstrained principle components (PCO) plot for *Vibrio* communities in the NRE. Each point represents the *Vibrio* community in a given water sample. The distance between points is the Bray-Curtis distance (dissimilarity) between *Vibrio* communities. Points associated with increased river discharge after Hurricane Matthew are labeled according to the number of days post-Matthew the sample was taken.

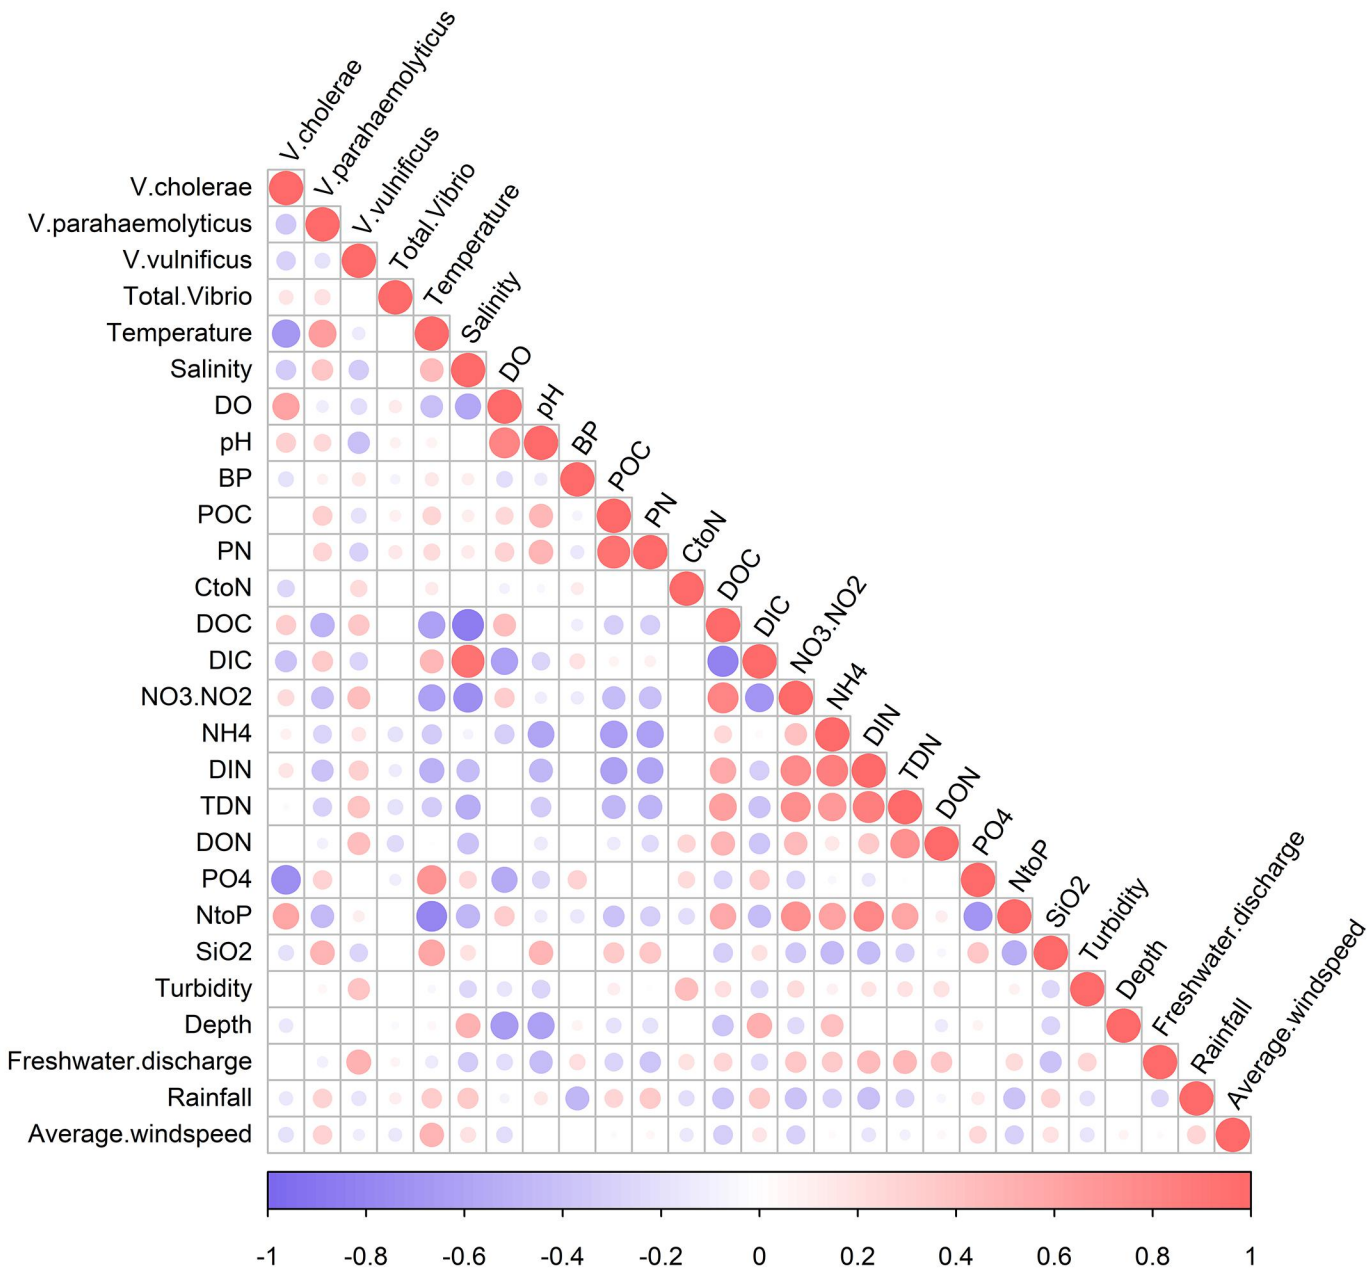

**Figure S7.** Spearman rank correlation plot showing correlations between potentially pathogenic *Vibrio* species *V. vulnificus*, *V. parahaemolyticus*, *V. cholerae*, as well as Total *Vibrio*, and environmental parameters. Only significant correlations ( $p < 0.05$ ) are plotted.

**Table S1:** Summary of samples and barcodes\*

| SampleID | Sample date | Station | Sample depth | Sample replicate | Barcode   |
|----------|-------------|---------|--------------|------------------|-----------|
| MAR_003  | 9-May-16    | 70      | surface      | 1                | TCCATGCG  |
| MAR_004  | 9-May-16    | 70      | bottom       | 1                | AGGTTTCGC |
| MAR_005  | 9-May-16    | 120     | surface      | 1                | GTCGAAGC  |
| MAR_006  | 9-May-16    | 120     | bottom       | 1                | ACGGCTGA  |
| MAR_011  | 9-May-16    | 70      | surface      | 2                | CGTTCTAA  |
| MAR_012  | 9-May-16    | 70      | bottom       | 2                | TGTGAACC  |
| MAR_013  | 9-May-16    | 120     | surface      | 2                | GGCCTATC  |
| MAR_014  | 9-May-16    | 120     | bottom       | 2                | GGATATAG  |
| MAR_007  | 24-May-16   | 70      | surface      | 1                | CTATCTGG  |
| MAR_008  | 24-May-16   | 70      | bottom       | 1                | TGGACTCT  |
| MAR_015  | 24-May-16   | 70      | surface      | 2                | GCTGAAGA  |
| MAR_016  | 24-May-16   | 70      | bottom       | 2                | CGGTGTCT  |
| MAR_017  | 24-May-16   | 120     | surface      | 1                | GTCAGCTG  |
| MAR_018  | 24-May-16   | 120     | bottom       | 1                | GCCGACTT  |
| MAR_025  | 24-May-16   | 120     | surface      | 2                | TCGCACAA  |
| MAR_026  | 24-May-16   | 120     | bottom       | 2                | ACCATCGT  |
| MAR_019  | 6-Jun-16    | 70      | surface      | 1                | CTAAGGAG  |
| MAR_020  | 6-Jun-16    | 70      | bottom       | 1                | TCAGGCCA  |
| MAR_021  | 6-Jun-16    | 120     | surface      | 1                | TACTTGCA  |
| MAR_022  | 6-Jun-16    | 120     | bottom       | 1                | CTTACTAG  |
| MAR_027  | 6-Jun-16    | 70      | surface      | 2                | AAGGCACG  |
| MAR_028  | 6-Jun-16    | 70      | bottom       | 2                | GCTAGTTC  |
| MAR_029  | 6-Jun-16    | 120     | surface      | 2                | CGCTGAAT  |
| MAR_030  | 6-Jun-16    | 120     | bottom       | 2                | CACCGATT  |
| MAR_023  | 7-Jun-16    | 70      | surface      | 1                | TGATCCTA  |
| MAR_024  | 7-Jun-16    | 70      | bottom       | 1                | ACGTTTCAT |
| MAR_031  | 7-Jun-16    | 70      | surface      | 2                | CATGGACG  |
| MAR_032  | 7-Jun-16    | 70      | bottom       | 2                | CATCTTAC  |
| MAR_033  | 7-Jun-16    | 120     | surface      | 1                | CTGTAACA  |
| MAR_034  | 7-Jun-16    | 120     | bottom       | 1                | GATGATCG  |
| MAR_041  | 7-Jun-16    | 120     | surface      | 2                | CACTTCTG  |
| MAR_042  | 7-Jun-16    | 120     | bottom       | 2                | CGCTAGTA  |
| MAR_035  | 8-Jun-16    | 70      | surface      | 1                | AGCCGTTA  |
| MAR_036  | 8-Jun-16    | 70      | bottom       | 1                | TAAGCATG  |
| MAR_037  | 8-Jun-16    | 120     | surface      | 1                | TGTGCGTA  |
| MAR_038  | 8-Jun-16    | 120     | bottom       | 1                | TGGCTCTA  |
| MAR_043  | 8-Jun-16    | 70      | surface      | 2                | GGAACGCT  |
| MAR_044  | 8-Jun-16    | 70      | bottom       | 2                | ATGACTCA  |
| MAR_045  | 8-Jun-16    | 120     | surface      | 2                | GTAGGACC  |
| MAR_046  | 8-Jun-16    | 120     | bottom       | 2                | GTACGCGT  |
| MAR_039  | 13-Jun-16   | 70      | surface      | 1                | CGACCTTA  |



**Table S1 continued:** Summary of samples and barcodes\*

| SampleID | Sample date | Station | Sample depth | Sample replicate | Barcode   |
|----------|-------------|---------|--------------|------------------|-----------|
| MAR_040  | 13-Jun-16   | 70      | bottom       | 1                | AGTGCCAC  |
| MAR_047  | 13-Jun-16   | 70      | surface      | 2                | AGATGGCT  |
| MAR_048  | 13-Jun-16   | 70      | bottom       | 2                | ATACGGAC  |
| MAR_049  | 13-Jun-16   | 120     | surface      | 1                | GAACGTAT  |
| MAR_050  | 13-Jun-16   | 120     | bottom       | 1                | AACCAGCT  |
| MAR_057  | 13-Jun-16   | 120     | surface      | 2                | CGAATCCT  |
| MAR_058  | 13-Jun-16   | 120     | bottom       | 2                | TAGCAGTG  |
| MAR_051  | 20-Jun-16   | 70      | surface      | 1                | GGCGCTTA  |
| MAR_052  | 20-Jun-16   | 70      | bottom       | 1                | CTTCGCAG  |
| MAR_053  | 20-Jun-16   | 120     | surface      | 1                | CGGCTACA  |
| MAR_054  | 20-Jun-16   | 120     | bottom       | 1                | CTCTACAG  |
| MAR_059  | 20-Jun-16   | 70      | surface      | 2                | GTGACATG  |
| MAR_060  | 20-Jun-16   | 70      | bottom       | 2                | CGGCAGAA  |
| MAR_061  | 20-Jun-16   | 120     | surface      | 2                | CAGCGTGT  |
| MAR_062  | 20-Jun-16   | 120     | bottom       | 2                | GTGTATGC  |
| MAR_055  | 6-Jul-16    | 70      | surface      | 1                | GCTTAATA  |
| MAR_056  | 6-Jul-16    | 70      | bottom       | 1                | ACCTCAGA  |
| MAR_063  | 6-Jul-16    | 70      | surface      | 2                | ACATTGCG  |
| MAR_064  | 6-Jul-16    | 70      | bottom       | 2                | TCTTCGAG  |
| MAR_065  | 6-Jul-16    | 120     | surface      | 1                | GCAACGTC  |
| MAR_066  | 6-Jul-16    | 120     | bottom       | 1                | GCAGCTCT  |
| MAR_073  | 6-Jul-16    | 120     | surface      | 2                | AACAGGTG  |
| MAR_074  | 6-Jul-16    | 120     | bottom       | 2                | TACCATGA  |
| MAR_067  | 18-Jul-16   | 70      | surface      | 1                | GAGGTTAC  |
| MAR_068  | 18-Jul-16   | 70      | bottom       | 1                | CATGAAGT  |
| MAR_069  | 18-Jul-16   | 120     | surface      | 1                | AGTATGCA  |
| MAR_070  | 18-Jul-16   | 120     | bottom       | 1                | GATGCCTT  |
| MAR_075  | 18-Jul-16   | 70      | surface      | 2                | CCAAC TAG |
| MAR_076  | 18-Jul-16   | 70      | bottom       | 2                | ATAGTCCG  |
| MAR_077  | 18-Jul-16   | 120     | surface      | 2                | TTAAGCGA  |
| MAR_078  | 18-Jul-16   | 120     | bottom       | 2                | ACGTCCTG  |
| MAR_071  | 3-Aug-16    | 70      | surface      | 1                | GCGAATAC  |
| MAR_072  | 3-Aug-16    | 70      | bottom       | 1                | ATCTGCGA  |
| MAR_079  | 3-Aug-16    | 70      | surface      | 2                | CAGTAATG  |
| MAR_080  | 3-Aug-16    | 70      | bottom       | 2                | TTCCATAG  |
| MAR_081  | 3-Aug-16    | 120     | surface      | 1                | TGCACAAT  |
| MAR_082  | 3-Aug-16    | 120     | bottom       | 1                | CATGAGGC  |
| MAR_089  | 3-Aug-16    | 120     | surface      | 2                | TTATAGGC  |
| MAR_090  | 3-Aug-16    | 120     | bottom       | 2                | GAGTGCTA  |
| MAR_086  | 17-Aug-16   | 120     | bottom       | 1                | CGAGTATC  |
| MAR_094  | 19-Aug-16   | 120     | bottom       | 2                | GTCTCGCA  |

**Table S1 continued:** Summary of samples and barcodes\*

| SampleID | Sample date | Station | Sample depth | Sample replicate | Barcode   |
|----------|-------------|---------|--------------|------------------|-----------|
| MAR_085  | 21-Aug-16   | 120     | surface      | 1                | TGACTAGT  |
| MAR_093  | 23-Aug-16   | 120     | surface      | 2                | GGCGTTAC  |
| MAR_084  | 25-Aug-16   | 70      | bottom       | 1                | AGCCTTCT  |
| MAR_092  | 27-Aug-16   | 70      | bottom       | 2                | TTGTGCAC  |
| MAR_083  | 29-Aug-16   | 70      | surface      | 1                | ACAGGAGT  |
| MAR_091  | 31-Aug-16   | 70      | surface      | 2                | ACGTCTTA  |
| MAR_131  | 8-Sep-16    | 120     | bottom       | 1                | AGGTTGCT  |
| MAR_132  | 10-Sep-16   | 120     | bottom       | 2                | TGTGAACCG |
| MAR_121  | 12-Sep-16   | 120     | surface      | 1                | TCCATGCGA |
| MAR_122  | 14-Sep-16   | 120     | surface      | 2                | CGTTCTAAG |
| MAR_088  | 16-Sep-16   | 70      | bottom       | 1                | GCGTCACG  |
| MAR_096  | 18-Sep-16   | 70      | bottom       | 2                | GTGCTACT  |
| MAR_141  | 19-Sep-16   | 70      | surface      | 1                | GTCGAAGCT |
| MAR_142  | 19-Sep-16   | 70      | surface      | 2                | GGCCTATCG |
| MAR_151  | 19-Sep-16   | 70      | bottom       | 1                | ACGGCTGAC |
| MAR_152  | 19-Sep-16   | 70      | bottom       | 2                | GGATATAGC |
| MAR_161  | 19-Sep-16   | 120     | surface      | 1                | CTATCTGGA |
| MAR_162  | 19-Sep-16   | 120     | surface      | 2                | GCTGAAGAC |
| MAR_171  | 19-Sep-16   | 120     | bottom       | 1                | TGGACTCTC |
| MAR_172  | 19-Sep-16   | 120     | bottom       | 2                | CGGTGTCTA |
| MAR_087  | 20-Sep-16   | 70      | surface      | 1                | CAATGTGC  |
| MAR_095  | 22-Sep-16   | 70      | surface      | 2                | TCTTGACG  |
| MAR_103  | 3-Oct-16    | 70      | surface      | 1                | GTCAGCTGA |
| MAR_104  | 3-Oct-16    | 70      | surface      | 2                | TCGCACAAG |
| MAR_113  | 3-Oct-16    | 70      | bottom       | 1                | GCCGACTTA |
| MAR_114  | 3-Oct-16    | 70      | bottom       | 2                | ACCATCGTG |
| MAR_123  | 3-Oct-16    | 120     | surface      | 1                | CTAAGGAGC |
| MAR_124  | 3-Oct-16    | 120     | surface      | 2                | AAGGCACGT |
| MAR_133  | 3-Oct-16    | 120     | bottom       | 1                | TCAGGCCAT |
| MAR_134  | 3-Oct-16    | 120     | bottom       | 2                | GCTAGTTCA |
| MAR_143  | 17-Oct-16   | 70      | surface      | 1                | TACTTGCAA |
| MAR_144  | 17-Oct-16   | 70      | surface      | 2                | CGCTGAATA |
| MAR_153  | 17-Oct-16   | 70      | bottom       | 1                | CTTACTAGG |
| MAR_154  | 17-Oct-16   | 70      | bottom       | 2                | CACCGATTA |
| MAR_163  | 17-Oct-16   | 120     | surface      | 1                | TGATCCTAG |
| MAR_164  | 17-Oct-16   | 120     | surface      | 2                | CATGGACGC |
| MAR_173  | 17-Oct-16   | 120     | bottom       | 1                | ACGTTCATA |
| MAR_174  | 17-Oct-16   | 120     | bottom       | 2                | CATCTTACG |
| MAR_105  | 24-Oct-16   | 70      | surface      | 1                | CTGTAACAG |
| MAR_106  | 24-Oct-16   | 70      | surface      | 2                | CACTTCTGG |
| MAR_115  | 24-Oct-16   | 70      | bottom       | 1                | GATGATCGT |

**Table S1 continued:** Summary of samples and barcodes\*

| SampleID | Sample date | Station | Sample depth | Sample replicate | Barcode   |
|----------|-------------|---------|--------------|------------------|-----------|
| MAR_116  | 24-Oct-16   | 70      | bottom       | 2                | CGCTAGTAG |
| MAR_125  | 24-Oct-16   | 120     | surface      | 1                | AGCCGTTAC |
| MAR_126  | 24-Oct-16   | 120     | surface      | 2                | GGAACGCTA |
| MAR_135  | 24-Oct-16   | 120     | bottom       | 1                | TAAGCATGG |
| MAR_136  | 24-Oct-16   | 120     | bottom       | 2                | ATGACTCAC |
| MAR_145  | 1-Nov-16    | 70      | surface      | 1                | TGTGCGTAC |
| MAR_146  | 1-Nov-16    | 70      | surface      | 2                | GTAGGACCA |
| MAR_155  | 1-Nov-16    | 70      | bottom       | 1                | TGGCTCTAA |
| MAR_156  | 1-Nov-16    | 70      | bottom       | 2                | GTACGCGTA |
| MAR_165  | 1-Nov-16    | 120     | surface      | 1                | CGACCTTAT |
| MAR_166  | 1-Nov-16    | 120     | surface      | 2                | AGATGGCTC |
| MAR_175  | 1-Nov-16    | 120     | bottom       | 1                | AGTGCCACT |
| MAR_176  | 1-Nov-16    | 120     | bottom       | 2                | ATACGGACG |
| MAR_107  | 8-Nov-16    | 70      | surface      | 1                | GAACGTATC |
| MAR_108  | 8-Nov-16    | 70      | surface      | 2                | CGAATCCTG |
| MAR_117  | 8-Nov-16    | 70      | bottom       | 1                | AACCAGCTG |
| MAR_118  | 8-Nov-16    | 70      | bottom       | 2                | TAGCAGTGA |
| MAR_127  | 8-Nov-16    | 120     | surface      | 1                | GGCGCTTAA |
| MAR_128  | 8-Nov-16    | 120     | surface      | 2                | GTGACATGT |
| MAR_137  | 8-Nov-16    | 120     | bottom       | 1                | CTTCGCAGG |
| MAR_138  | 8-Nov-16    | 120     | bottom       | 2                | CGGCAGAAT |
| MAR_147  | 15-Nov-16   | 70      | surface      | 1                | CGGCTACAA |
| MAR_148  | 15-Nov-16   | 70      | surface      | 2                | CAGCGTGTA |
| MAR_157  | 15-Nov-16   | 70      | bottom       | 1                | CTCTACAGA |
| MAR_158  | 15-Nov-16   | 70      | bottom       | 2                | GTGTATGCA |
| MAR_167  | 15-Nov-16   | 120     | surface      | 1                | GCTTAATAG |
| MAR_168  | 15-Nov-16   | 120     | surface      | 2                | ACATTGCGT |
| MAR_177  | 15-Nov-16   | 120     | bottom       | 1                | ACCTCAGAG |
| MAR_178  | 15-Nov-16   | 120     | bottom       | 2                | TCTTCGAGC |
| MAR_109  | 28-Nov-16   | 70      | surface      | 1                | GCAACGTCT |
| MAR_110  | 28-Nov-16   | 70      | surface      | 2                | AACAGGTGC |
| MAR_119  | 28-Nov-16   | 70      | bottom       | 1                | GCAGCTCTA |
| MAR_120  | 28-Nov-16   | 70      | bottom       | 2                | TACCATGAG |
| MAR_129  | 28-Nov-16   | 120     | surface      | 1                | GAGGTTACC |
| MAR_130  | 28-Nov-16   | 120     | surface      | 2                | CCAAGTAGT |
| MAR_139  | 28-Nov-16   | 120     | bottom       | 1                | CATGAAGTC |
| MAR_140  | 28-Nov-16   | 120     | bottom       | 2                | ATAGTCCGC |
| MAR_149  | 13-Dec-16   | 70      | surface      | 1                | AGTATGCAG |
| MAR_150  | 13-Dec-16   | 70      | surface      | 2                | TTAAGCGAT |
| MAR_159  | 13-Dec-16   | 70      | bottom       | 1                | GATGCCTTA |
| MAR_160  | 13-Dec-16   | 70      | bottom       | 2                | ACGTCCTGA |

**Table S1 continued:** Summary of samples and barcodes\*

| SampleID | Sample date | Station     | Sample depth | Sample replicate | Barcode   |
|----------|-------------|-------------|--------------|------------------|-----------|
| MAR_169  | 13-Dec-16   | 120         | surface      | 1                | GCGAATACT |
| MAR_170  | 13-Dec-16   | 120         | surface      | 2                | CAGTAATGC |
| MAR_179  | 13-Dec-16   | 120         | bottom       | 1                | ATCTGCGAA |
| MAR_180  | 13-Dec-16   | 120         | bottom       | 2                | TTCCATAGC |
| MAR_102  | DI_H2O      | DI_H2O      | DI_H2O       | DI_H2O           | GTGTCCAA  |
| MAR_111  | mock_comm_1 | mock_comm_1 | mock_comm_1  | mock_comm_1      | GTGTCCAAT |
| MAR_112  | mock_comm_2 | mock_comm_2 | mock_comm_2  | mock_comm_2      | TGTCGTCAA |
| MAR_002  | mock_comm_1 | mock_comm_1 | mock_comm_1  | mock_comm_1      | GTGTCCAA  |
| MAR_010  | mock_comm_2 | mock_comm_2 | mock_comm_2  | mock_comm_2      | TGTCGTCA  |
| MAR_001  | NEC         | NEC         | NEC          | NEC              | CGTCGGTA  |
| MAR_101  | NEC         | NEC         | NEC          | NEC              | CGTCGGTAA |
| MAR_009  | DI_H2O      | DI_H2O      | DI_H2O       | DI_H2O           | ATTGTGAG  |

\*The same barcodes were used for both *hsp60* and 16S rRNA libraries; libraries for each amplicon were sequenced in separate MiSeq runs.

**Table S2.** All variables tested in the DistLM

| Variable                         | Variable type | Variable description                                                                            | Fitted in the sequential distLM |
|----------------------------------|---------------|-------------------------------------------------------------------------------------------------|---------------------------------|
| Month                            | Temporal      | Month during which sample was collected                                                         | yes                             |
| Salinity                         | Environmental | See Table 1                                                                                     | yes                             |
| Days post Hurricane Matthew      | Temporal      | Days after Hurricane Matthew passed; for Hurricane Matthew-associated samples only              | yes                             |
| PO <sub>4</sub>                  | Environmental | See Table 1                                                                                     | yes                             |
| NO <sub>3</sub> /NO <sub>2</sub> | Environmental | See Table 1                                                                                     | yes                             |
| Rainfall                         | Environmental | See Table 1                                                                                     | yes                             |
| C:N                              | Environmental | See Table 1                                                                                     | yes                             |
| DON                              | Environmental | See Table 1                                                                                     | yes                             |
| River discharge                  | Environmental | See Table 1                                                                                     | yes                             |
| DO                               | Environmental | See Table 1                                                                                     | yes                             |
| Station                          | Categorical   | ModMon station at which sample was collected (see Figure 1)                                     | yes                             |
| NH <sub>4</sub>                  | Environmental | See Table 1                                                                                     | yes                             |
| Temperature                      | Environmental | See Table 1                                                                                     | yes                             |
| Chlorophyll-a                    | Environmental | See Table 1                                                                                     | yes                             |
| SiO <sub>2</sub>                 | Environmental | See Table 1                                                                                     | yes                             |
| Turbidity                        | Environmental | See Table 1                                                                                     | yes                             |
| DIC                              | Environmental | See Table 1                                                                                     | yes                             |
| TSS                              | Environmental | See Table 1                                                                                     | yes                             |
| BP                               | Environmental | See Table 1                                                                                     | yes                             |
| Tropical Storm Colin             | Categorical   | Association with increased river discharge following Tropical Storm Collin                      | yes                             |
| Average wind speed               | Environmental | See Table 1                                                                                     | yes                             |
| Hurricane Matthew                | Categorical   | Sample collected                                                                                | yes                             |
| Depth                            | Environmental | Water depth (m) sample was collected at                                                         | yes                             |
| Storm sampling                   | Categorical   | Association with increased river discharge following Tropical Storm Collin or Hurricane Matthew | yes                             |
| DOC                              | Environmental | See Table 1                                                                                     | yes                             |
| Days post Tropical Storm Collin  | Temporal      | Days after Tropical Storm Collin passed; for Tropical Storm Collin-associated samples only      | no                              |
| Season                           | Temporal      | Season (summer, spring, fall, or winter) during which sample was collected                      | no                              |
| pH                               | Environmental | See Table 1                                                                                     | no                              |
| POC                              | Environmental | See Table 1                                                                                     | no                              |
| PN                               | Environmental | See Table 1                                                                                     | no                              |
| TDN                              | Environmental | See Table 1                                                                                     | no                              |
| N:P                              | Environmental | See Table 1                                                                                     | no                              |
| PPR                              | Environmental | See Table 1                                                                                     | no                              |

**Table S3.** Wilcoxon rank paired sample statistics for alpha diversity estimates

| Paired variables                     | p-value |
|--------------------------------------|---------|
| 16S Vibrio and hsp60 Vibrio observed | <0.0001 |
| 16S Vibrio and hsp60 Vibrio chao1    | <0.0001 |
| 16S Vibrio and hsp60 Vibrio Shannon  | <0.0001 |
| 16S and hsp60 observed               | <0.0001 |
| 16S and hsp60 chao1                  | <0.0001 |
| 16S and hsp60 Shannon                | <0.0001 |

**Table S4.** Pearson correlation statistics for alpha diversity estimates

| Paired variables                     | Correlation coefficient | p-value |
|--------------------------------------|-------------------------|---------|
| 16S Vibrio and hsp60 Vibrio observed | -0.078                  | 0.321   |
| 16S Vibrio and hsp60 Vibrio chao1    | -0.013                  | 0.866   |
| 16S Vibrio and hsp60 Vibrio Shannon  | -0.050                  | 0.528   |
| 16S and hsp60 observed               | 0.353                   | <0.0001 |
| 16S and hsp60 chao1                  | 0.297                   | <0.0001 |
| 16S and hsp60 Shannon                | 0.303                   | <0.0001 |
